# Supplementary material
Source: PubMed Central journal article supplement (PMC5927696)

## Supplementary Figure legends

### **Figure S1. *ROCK2* knockdown using shRNA for another target sequence also decreases nuclear accumulation of YAP.**

MCF-7 cells were infected with either a control or *ROCK2* shRNA-#2-expressing retrovirus. (A) The expression of *ROCK2* and *CTGF* were evaluated by quantitative real-time PCR. Each bar represents the mean  $\pm$  S.D.; n = 3. Asterisks, p < 0.01. (B) Confocal images of cells stained for YAP (green) and DAPI (blue). Scale bars, 20  $\mu$ m. Z-stack images with an interval of 1.0  $\mu$ m were obtained using a confocal microscope, and projected images are shown. (C) The mean nuclear fluorescence intensity for the stained YAP was quantified using ImageJ software. The relative fluorescence intensities are shown. Each bar represents the mean  $\pm$  S.D.; n = 50. Asterisks, p < 0.01.

# Supplementary Figure S1

A

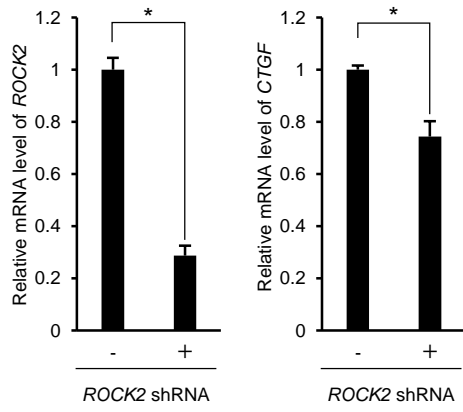

B

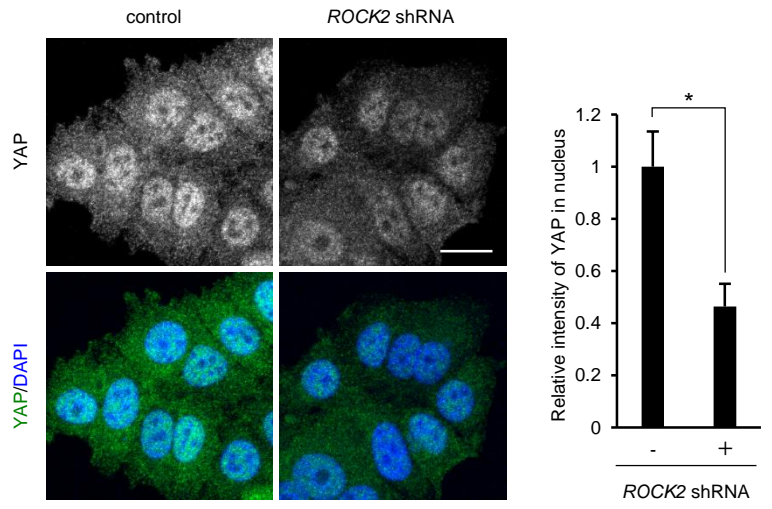

Supplement: kcam-12-02-1338233-s001.pdf [file kcam-12-02-1338233-s001.pdf]
